# Supplementary material for: Fear of Darkness, the Full Moon and the Nocturnal Ecology of African Lions
Source: PubMed Central journal article supplement (PMC3140494; doi:10.1371/journal.pone.0022285), 2011-07-20
Supplement: pone.0022285.s001.pdf [file pone.0022285.s001.pdf]

**Table S1.** Sample sizes for food-intake and carcass-acquisition analyses in the Serengeti and Ngorongoro.

| <b>Data for belly size regression models</b> |                  |                |                      |
|----------------------------------------------|------------------|----------------|----------------------|
|                                              | <b>N females</b> | <b>N males</b> | <b>Years of data</b> |
| <b>Ngorongoro Crater</b>                     | 1584             | 1154           | 26                   |
| <b>Serengeti Plains</b>                      | 2867             | 1256           | 29                   |
| <b>Serengeti Woodlands</b>                   | 3232             | 1417           | 29                   |
| <b>total</b>                                 | <b>7,683</b>     | <b>3,827</b>   |                      |

*N = number of sightings of known-aged lions where belly size was recorded, taking only 1 sighting per pride per day*

| <b>Data for carcass regressions</b> |              |                 |                            |                           |
|-------------------------------------|--------------|-----------------|----------------------------|---------------------------|
| <b>Habitat</b>                      | <b>Kills</b> | <b>Scavenge</b> | <b>Previously obtained</b> | <b>Total Observations</b> |
| <b>Ngorongoro Crater</b>            | 291          | 42              | 486                        | 7060                      |
| <b>Serengeti Plains</b>             | 379          | 113             | 842                        | 16353                     |
| <b>Serengeti Woodlands</b>          | 607          | 120             | 1454                       | 21212                     |
| <b>Serengeti nomads</b>             | 48           | 20              | 193                        | 1448                      |
| <b>total</b>                        | <b>1325</b>  | <b>295</b>      | <b>2975</b>                | <b>46073</b>              |

*N = number of sightings since 1966 in Serengeti and 1975 in Ngorongoro. "Previously obtained" - lions were found feeding when first observed that day*
