# Supplementary material for: Fear of Darkness, the Full Moon and the Nocturnal Ecology of African Lions
Source: PubMed Central journal article supplement (PMC3140494; doi:10.1371/journal.pone.0022285), 2011-07-20
Supplement: pone.0022285.s002.pdf [file pone.0022285.s002.pdf]

**Table S2.** Belly size of females in Serengeti and Ngorongoro. Females have lower food intakes during the brightest phase of the moon and in the Serengeti woodlands and plains. Plains females have higher food intake during the wet season.

**Female belly size: Model Summary**

Linear mixed model fit by maximum likelihood

Formula: *avg.belly ~ luminosity + habitat + season + habitat\*season + (1|pride) + (1|year)*

**Random effects:**

| Groups   | Name        | Variance  | Std.Dev. |
|----------|-------------|-----------|----------|
| Pride    | (Intercept) | 0.0026491 | 0.051469 |
| Year     | (Intercept) | 0.0205052 | 0.143196 |
| Residual |             | 0.3067    | 0.5538   |

Number of observations: 7683, groups: pride, 68; year, 29

**Fixed effects:**

|                     | Estimate | Std. Error | t value |
|---------------------|----------|------------|---------|
| (Intercept)         | 2.50789  | 0.03947    | 63.54   |
| Luminosity          | -0.1102  | 0.01800    | -6.13   |
| PlainsHabitat       | -0.2110  | 0.03424    | -6.16   |
| WoodlandsHabitat    | -0.1043  | 0.0341     | -3.06   |
| WetSeason           | -0.0102  | 0.0285     | -0.36   |
| Plains:WetSeason    | 0.2511   | 0.0355     | 7.08    |
| Woodlands:WetSeason | -0.0165  | 0.0350     | -0.47   |

**Females: ANOVA Comparison of final model to the next simplest model**

♀ *model w/o luminosity: avg.belly ~ habitat+season+habitat\*season+(1|pride)+(1|year)*

♀ *model w/luminosity: avg.belly ~ luminosity+habitat+season+habitat\*season+(1|pride)+(1|year)*

|                               | Df | AIC     | BIC     | logLik  | $\chi^2$ | Df | Pr(> $\chi^2$ ) |
|-------------------------------|----|---------|---------|---------|----------|----|-----------------|
| <b>Females w/o luminosity</b> | 9  | 12896.2 | 12958.8 | -6439.1 |          |    |                 |
| <b>Females w/luminosity</b>   | 10 | 12860.8 | 12930.2 | -6420.4 | 37.5     | 1  | 9.21E-10        |
