# Supplementary material for: Fear of Darkness, the Full Moon and the Nocturnal Ecology of African Lions
Source: PubMed Central journal article supplement (PMC3140494; doi:10.1371/journal.pone.0022285), 2011-07-20
Supplement: pone.0022285.s003.pdf [file pone.0022285.s003.pdf]

**Table S3.** Belly size of male lions in Serengeti and Ngorongoro. Males have lower food intake during the brightest phase of the moon and in the Serengeti plains and woodlands. Plains and woodlands males have higher food intakes during the wet season.

**Male belly size: Model Summary**

Linear mixed model fit by maximum likelihood

Formula:  $avg.belly \sim luminosity + habitat + season + habitat*season + (1|pride) + (1|year)$

**Random effects:**

| Groups   | Name        | Variance  | Std.Dev. |
|----------|-------------|-----------|----------|
| Pride    | (Intercept) | 0.0068098 | 0.082522 |
| Year     | (Intercept) | 0.0270298 | 0.164407 |
| Residual |             | 0.3754961 | 0.612777 |

Number of observations: 3827, groups: pride, 63; year, 29

**Fixed effects:**

|                     | Estimate | Std. Error | t value |
|---------------------|----------|------------|---------|
| (Intercept)         | 2.31907  | 0.05391    | 43.02   |
| Luminosity          | -0.11262 | 0.02823    | -3.99   |
| PlainsHabitat       | -0.37533 | 0.05599    | -6.70   |
| WoodlandsHabitat    | -0.17724 | 0.05487    | -3.23   |
| WetSeason           | -0.09045 | 0.03735    | -2.42   |
| Plains:WetSeason    | 0.39960  | 0.05267    | 7.59    |
| Woodlands:WetSeason | 0.15616  | 0.05036    | 3.10    |

**Male belly size: ANOVA Comparison of final model to the next simplest model**

♂ model w/o luminosity:  $avg.belly \sim habitat+season+habitat*season+(1|pride)+(1|year)$

♂ model w/luminosity:  $avg.belly \sim luminosity+habitat+season+habitat*season+(1|pride)+(1|year)$

|                             | Df | AIC    | BIC    | logLik  | $\chi^2$ | Df | Pr(> $\chi^2$ ) |
|-----------------------------|----|--------|--------|---------|----------|----|-----------------|
| <b>Males w/o luminosity</b> | 9  | 7244.5 | 7300.8 | -3613.3 |          |    |                 |
| <b>Males w/luminosity</b>   | 10 | 7230.7 | 7293.2 | -3605.3 | 15.871   | 1  | 6.78E-05        |
