# Supplementary material for: Fear of Darkness, the Full Moon and the Nocturnal Ecology of African Lions
Source: PubMed Central journal article supplement (PMC3140494; doi:10.1371/journal.pone.0022285), 2011-07-20
Supplement: pone.0022285.s005.pdf [file pone.0022285.s005.pdf]

**Table S5.** Probability of lions being observed making a kill during the daytime. Daytime kills were more common during the brightest phase of the moon, in the Serengeti woodlands and in the Serengeti plains during the wet season.

**DAYTIME KILLS**

Call: glm(formula = count ~ luminosity + habitat\*season, family = Poisson)

**Deviance Residuals:**

| <b>Min</b> | <b>1Q</b> | <b>Median</b> | <b>3Q</b> | <b>Max</b> |
|------------|-----------|---------------|-----------|------------|
| -2.5495    | -0.7235   | -0.1364       | 0.7352    | 3.0861     |

**Coefficients:**

|                  | <b>Estimate</b> | <b>Std. Error</b> | <b>z value</b> | <b>Pr(&gt; z )</b> |
|------------------|-----------------|-------------------|----------------|--------------------|
| (Intercept)      | 2.15443         | 0.09097           | 23.684         | < 2e-16            |
| Luminosity       | 0.36144         | 0.07986           | 4.526          | 6.01E-06           |
| PlainsHabitat    | 0.09764         | 0.11056           | 0.883          | 0.377              |
| WoodsHabitat     | 0.74620         | 0.09721           | 7.676          | 1.64E-14           |
| WetSeason        | -0.14458        | 0.11755           | -1.230         | 0.219              |
| Plains:WetSeason | 0.32981         | 0.15641           | 2.109          | 0.035              |
| Woods:WetSeason  | -0.02386        | 0.14302           | -0.167         | 0.868              |

(Dispersion parameter for Poisson family taken to be 1)

Null deviance: 260.25 on 89 degrees of freedom

Residual deviance: 109.15 on 83 degrees of freedom

AIC: 519.20

Number of Fisher Scoring iterations: 4

**Analysis of Deviance Table**

Model 1: count ~ habitat \* season

Model 2: count ~ luminosity + habitat \* season

|                       | <b>Resid.Df</b> | <b>Resid. Dev</b> | <b>Df</b> | <b>Deviance</b> | <b>P(&gt; <math>\chi^2</math> )</b> |
|-----------------------|-----------------|-------------------|-----------|-----------------|-------------------------------------|
| <b>w/o luminosity</b> | 84              | 129.76            |           |                 |                                     |
| <b>w/ luminosity</b>  | 83              | 109.15            | 1         | 20.61           | 5.63E-06                            |
