# Supplementary material for: Fear of Darkness, the Full Moon and the Nocturnal Ecology of African Lions
Source: PubMed Central journal article supplement (PMC3140494; doi:10.1371/journal.pone.0022285), 2011-07-20
Supplement: pone.0022285.s006.pdf [file pone.0022285.s006.pdf]

**Table S6.** Probability of lions observed scavenging during the daytime. Scavenging was more common during the brightest phase of the moon and in the Serengeti plains and woodlands, but less common during the wet season in the woodlands.

**SCAVENGING**

Call: glm(formula = count ~ luminosity + habitat\*season, family = Poisson)

**Deviance Residuals:**

| Min     | 1Q      | Median  | 3Q     | Max    |
|---------|---------|---------|--------|--------|
| -2.8081 | -0.9708 | -0.2116 | 0.6237 | 2.5691 |

**Coefficients:**

|                  | Estimate | Std. Error | z value | Pr(> z ) |
|------------------|----------|------------|---------|----------|
| (Intercept)      | -0.5140  | 0.2871     | -1.79   | 7.34E-02 |
| Luminosity       | 0.8148   | 0.1763     | 4.62    | 3.83E-06 |
| PlainsHabitat    | 1.1896   | 0.3052     | 3.898   | 9.72E-05 |
| WoodsHabitat     | 1.7304   | 0.2900     | 5.968   | 2.41E-09 |
| WetSeason        | 0.6931   | 0.3273     | 2.118   | 0.034199 |
| Plains:WetSeason | -0.3171  | 0.3792     | -0.836  | 0.403034 |
| Woods:WetSeason  | -1.3490  | 0.3797     | -3.553  | 0.000381 |

(Dispersion parameter for Poisson family taken to be 1)

Null deviance: 197.64 on 89 degrees of freedom

Residual deviance: 08.34 on 83 degrees of freedom

AIC: 352.89

Number of Fisher Scoring iterations: 5

**Analysis of Deviance Table**

Model 1: count ~ habitat \* season

Model 2: count ~ luminosity + habitat \* season

|                       | Resid. Df | Resid. Dev | Df | Deviance | P(>  $\chi^2$  ) |
|-----------------------|-----------|------------|----|----------|------------------|
| <b>w/o luminosity</b> | 84        | 130.347    |    |          |                  |
| <b>w/ luminosity</b>  | 83        | 108.338    | 1  | 22.009   | 2.71E-06         |
